# Supplementary material for: The Relationship between Ambient Fine Particulate Matter (PM2.5) Pollution and Depression: An Analysis of Data from 185 Countries
Source: MDPI journal article supplement (doi:10.3390/atmos14030597), 2023-03-21
Supplement: s1 [file s1]

**Supplementary Table S1:** Bivariate correlations between the incidence of depression and potential confounding factors.

| <b>Variable</b>                                                                 | Depression,<br>incidence,<br>total (2010) | Depression,<br>incidence,<br>male (2010) | Depression,<br>incidence,<br>female<br>(2010) | Depression,<br>incidence,<br>total (2019) | Depression,<br>incidence,<br>total (2019) | Depression,<br>incidence,<br>total (2019) |
|---------------------------------------------------------------------------------|-------------------------------------------|------------------------------------------|-----------------------------------------------|-------------------------------------------|-------------------------------------------|-------------------------------------------|
| Gross<br>national<br>income<br>per capita                                       | -0.06 (0.399)                             | -0.11 (0.144)                            | -0.03 (0.722)                                 | -0.07 (0.342)                             | -0.12 (0.103)                             | -0.03 (0.684)                             |
| Average<br>years of<br>adult<br>education                                       | <b>-0.23 (0.002)</b>                      | <b>-0.30 (&lt;0.001)</b>                 | <b>-0.18 (0.022)</b>                          | <b>-0.26 (&lt;0.001)</b>                  | <b>-0.32 (&lt;0.001)</b>                  | <b>-0.19 (0.010)</b>                      |
| Populatio<br>n density                                                          | 0.01 (0.934)                              | 0.00 (0.999)                             | 0.01 (0.895)                                  | 0.01 (0.878)                              | 0.00 (0.956)                              | 0.02 (0.834)                              |
| Percentag<br>e of<br>adults<br>with<br>insufficie<br>nt<br>physical<br>activity | -0.09 (0.285)                             | -0.15 (0.071)                            | -0.04 (0.607)                                 | -0.07 (0.382)                             | -0.14 (0.085)                             | -0.02 (0.792)                             |
| Distance<br>from the<br>equator                                                 | -.01 (.904)                               | -.12 (.114)                              | .07 (.379)                                    | -.02 (.832)                               | -.13 (.083)                               | .06 (.395)                                |

All correlations are given as Pearson's  $r$  ( $p$  value). Values indicated in **bold** are significant at  $p < .05$ .
