# Supplementary material for: The Relationship between Ambient Fine Particulate Matter (PM2.5) Pollution and Depression: An Analysis of Data from 185 Countries
Source: MDPI journal article supplement (doi:10.3390/atmos14030597), 2023-03-21
Supplement: s1 [file s1]

Archive with 1 entries (1 files):
- Supplementary Table S1 - Clean.pdf
